# Supplementary material for: Single cell multiomic analysis reveals diabetes-associated β-cell heterogeneity driven by HNF1A
Source: PubMed Central journal article supplement (PMC10480445; doi:10.1038/s41467-023-41228-3), 2023-09-05
Supplement: 41467_2023_41228_MOESM1_ESM.pdf [file 41467_2023_41228_MOESM1_ESM.pdf]

## **Supplementary Information**

### **Single cell multiomic analysis reveals diabetes-associated $\beta$ -cell heterogeneity driven by *HNF1A***

**Supplementary Fig. 1 scRNA-seq and snATAC-seq filtering strategies and quality control.**

**Supplementary Fig. 2. Peak-Gene pair analysis.**

**Supplementary Fig. 3. 3D genome analysis in  $\alpha$ - and  $\beta$ -cells.**

**Supplementary Fig. 4. A network of T2D upregulated peak-gene pairs.**

**Supplementary Fig. 5. Role of HNF1A in Type II Diabetes.**

**Supplementary Fig. 6. HNF1A Cut&Run in EndoC- $\beta$ H3.**

**Supplementary Fig. 7. Additional Patch-seq data analysis related to *HNF1A* functions.**

**Supplementary Table 1. eHi-C reads summary.**

**Supplementary Table 2. Tn5 oligos.**

**Supplementary Table 3. PCR oligos.**

**Supplementary Table 4. qPCR primers.**

**Supplementary Table 5. Antibodies used in this study.**

**Supplementary Table 6. Patient Donor Information used in this study.**

# Supplementary Fig 1

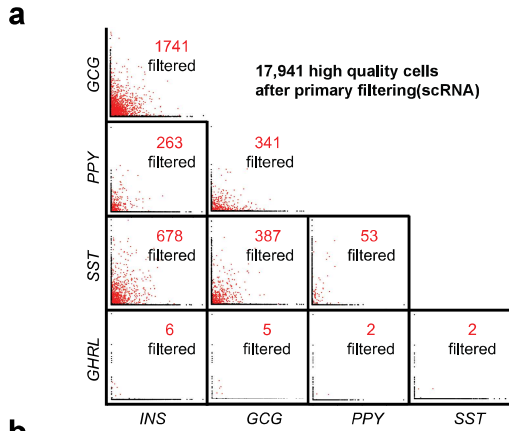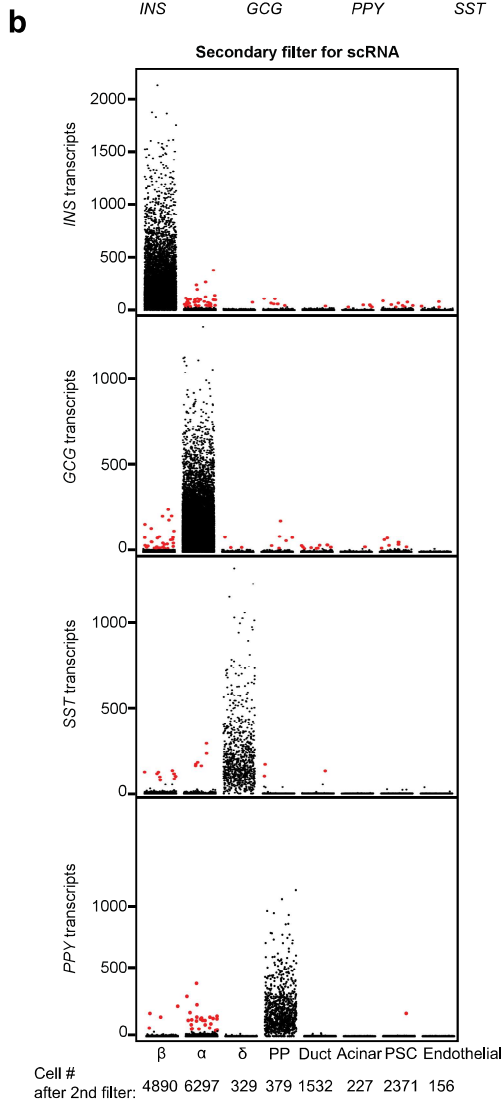

● Cells to keep  
● Cells to filter (secondary)

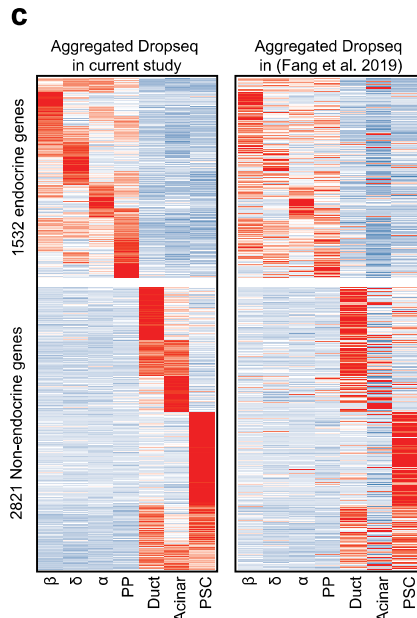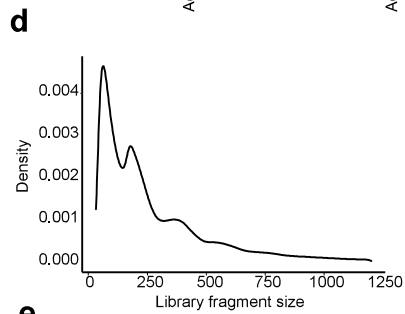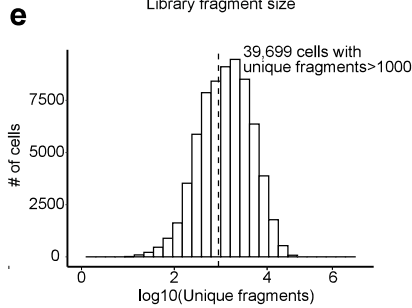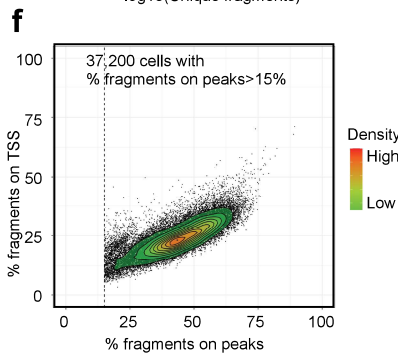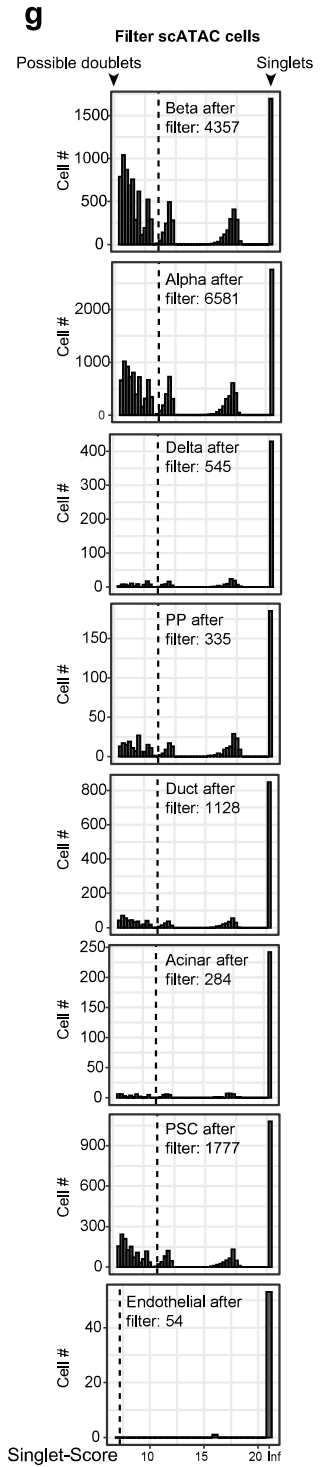

**Supplementary Fig. 1 scRNA-seq and snATAC-seq filtering strategies and quality control.**

(a) Hormone-based doublets filtering strategy for scRNA-seq data. In principle, any cell that expresses two or more hormone gene is labeled as a doublet and filtered. (b) Secondary doublets filtering for scRNA-seq data. After clustering and cell-type annotation using the global transcriptome landscapes, if a classified cell is highly expressing a hormone gene not consistent with the defined cell type, this cell is filtered. (c) Cell type specific gene expression profile comparison between current cohort and our previously published cohort. Aggregated RPKM is used for visualization and comparison. (d-f) snATAC-seq quality control. (d) snATAC data fragment size distribution. (e) Distribution of the number of unique fragments per cell. (f) snATAC-seq data filtering using the percentage on peaks versus the percentage on TSS. (g) snATAC-seq doublets filtering based on the KNN distance ratio (**Methods**).

## Supplementary Fig 2

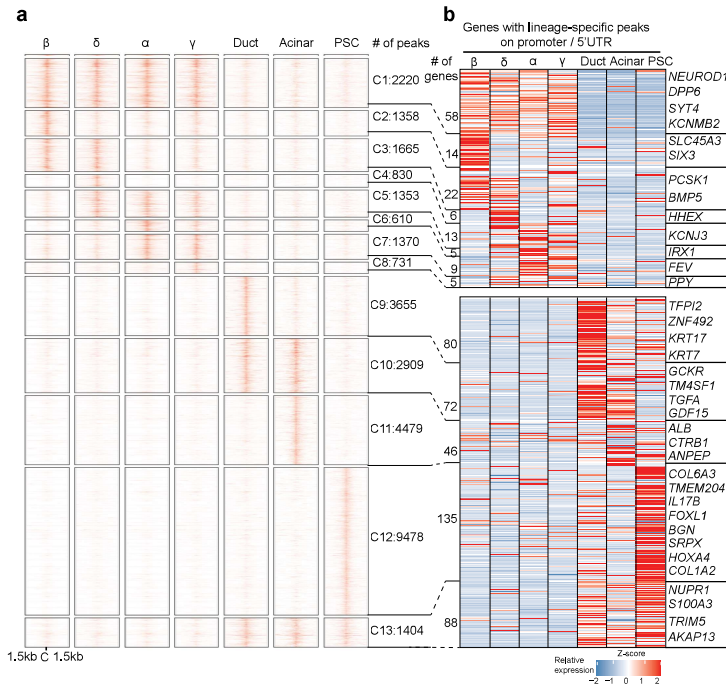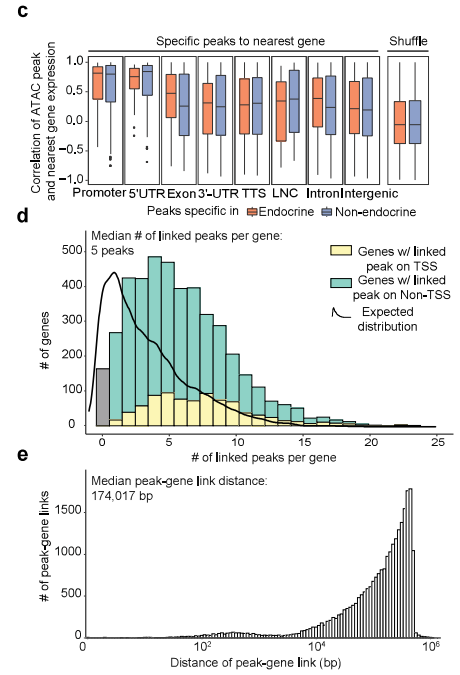

## **Supplementary Fig. 2. Peak-Gene pair analysis.**

(**a-b**) Identify thirteen categories of cell type specific peaks (**a**) and their corresponding genes (**b**) if the peaks are located at promoter (-1kb to +100bp) or 5' UTRs. (**c**) Correlation (Pearson's  $r$ ) between cell-type specific ATAC peaks and their nearest genes stratified by the peak locations. (**d-e**) Peak-gene link analysis based on correlation instead of proximity (**Methods**). (**d**) Summary of the number of linked peaks for each gene. (**e**) Summary of the genomic distance between the peak-gene pairs.

## Supplementary Fig 3

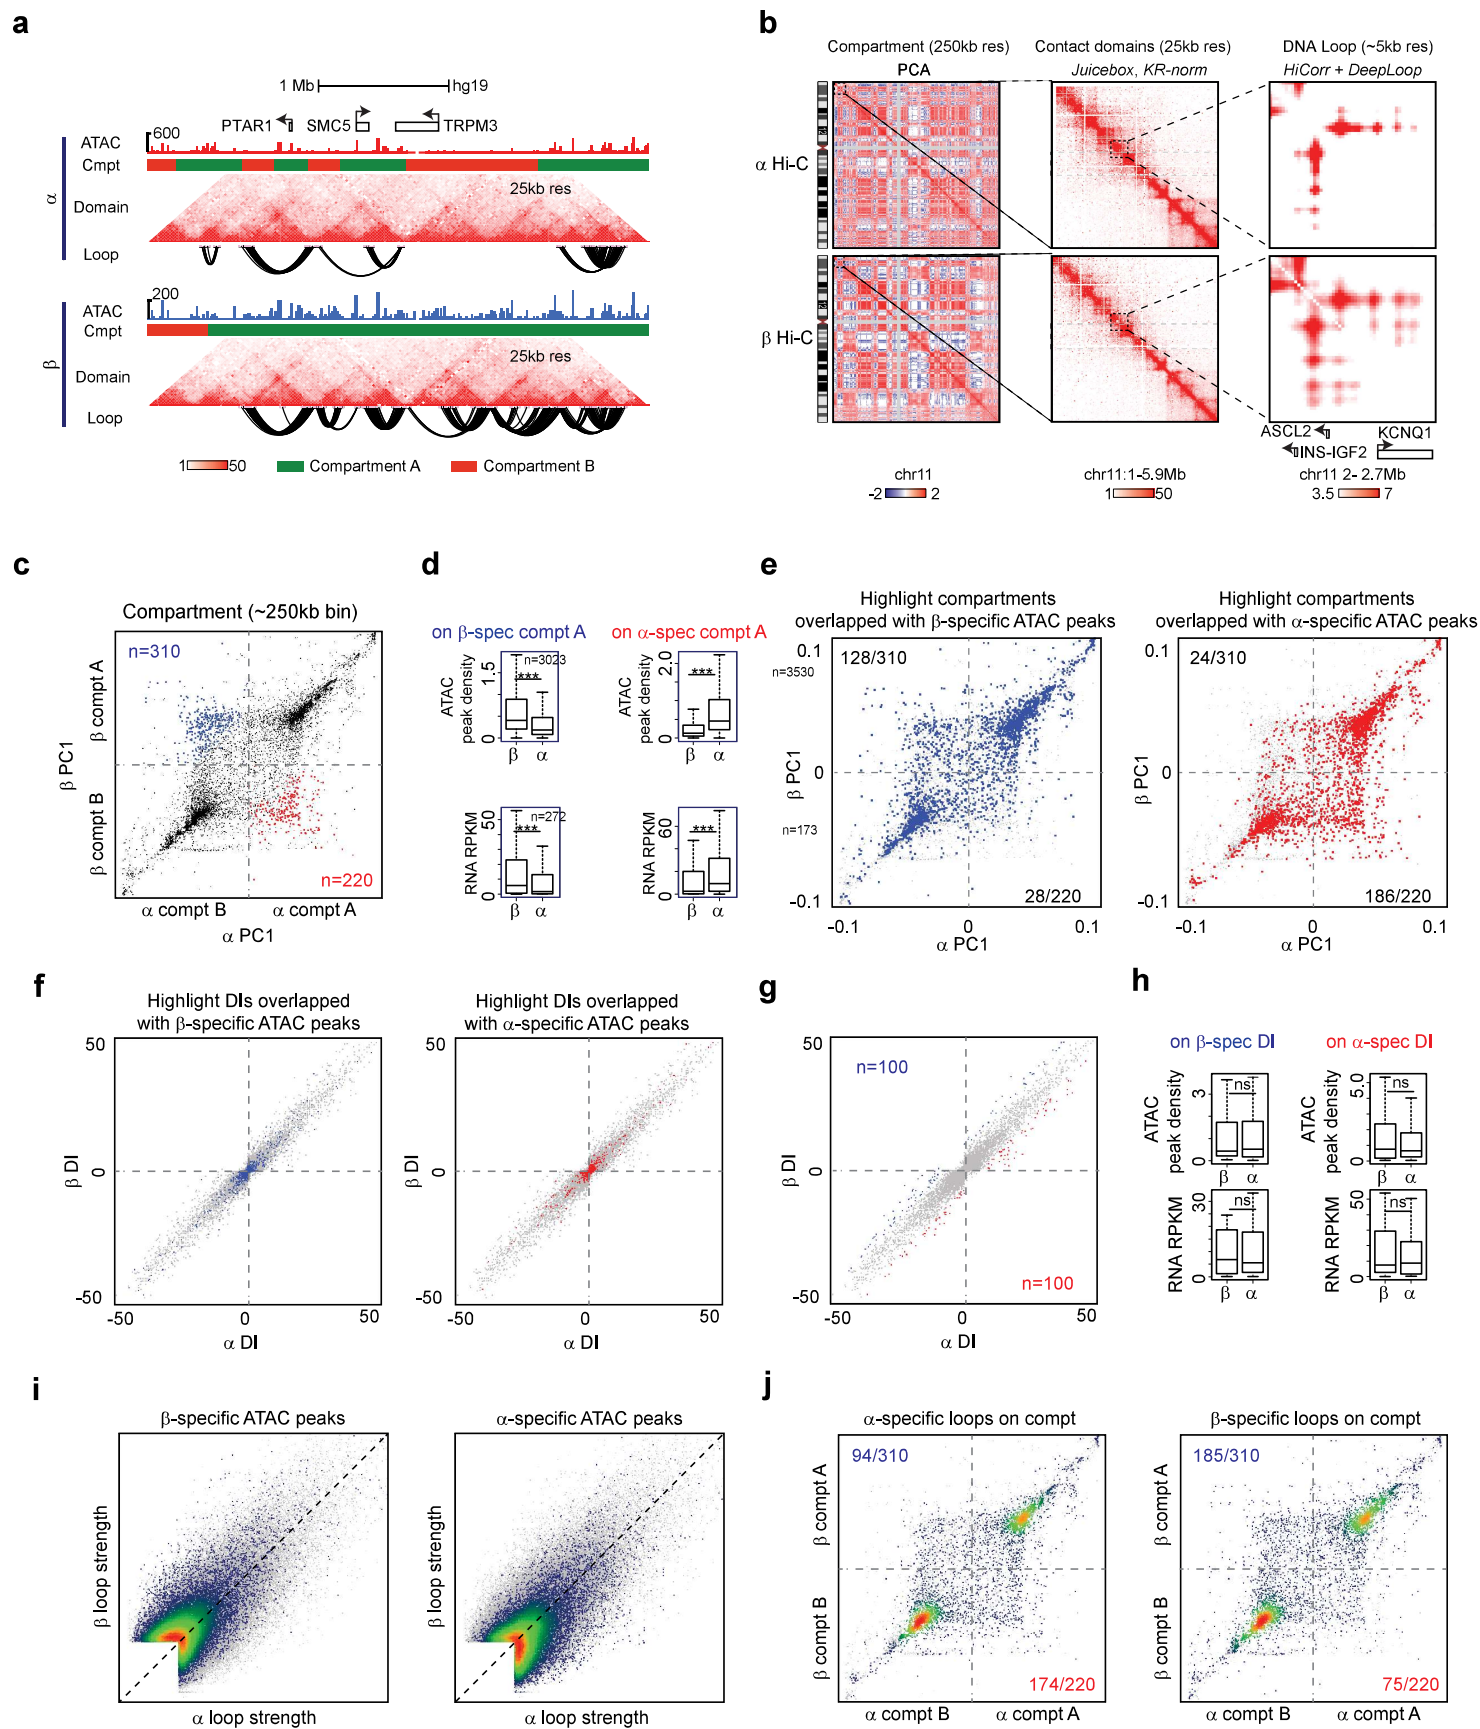

### Supplementary Fig. 3. 3D genome analysis in $\alpha$ - and $\beta$ -cells.

(a) Genomic tracks showing ATAC, compartment A/B, contact heatmaps, and chromatin loop curves in  $\alpha$ -cell and  $\beta$ -cell at locus chr9:73129495-74491882. (b) Hierarchical genome architecture (compartment, contact domains and DNA Loops) near *INS-IGF2* locus in both  $\alpha$ - and  $\beta$ -cells. (c) Scatterplot comparing PC1 values from compartment analyses in  $\alpha$ - and  $\beta$ -cells. Highlighted dots are the  $\alpha$ -cell or  $\beta$ -cell specific compartment A bins (250kb resolution). (d) Boxplots comparing the ATAC intensity (top two panels) and gene expression (bottom two panels) with the 220  $\alpha$ -cell or  $\beta$ -cell specific compartment A regions from (c). (e) The scatterplots compare the PC1 values of  $\alpha$ -cell and  $\beta$ -cell Hi-C data in compartment-level analyses (each dot represents a 250kb bin). Blue highlights bins overlapping 5,000  $\beta$ -cell specific ATAC peaks. Red highlights bins overlapping 5,000  $\alpha$ -cell specific ATAC peaks. (f) The scatterplots compare the DI (direction index) values of  $\alpha$ -cell and  $\beta$ -cell Hi-C data in TAD-level analysis (each dot represents a 25kb bin). Left panel highlights the bins overlapping  $\beta$ -cell specific ATAC peaks; Right panel highlights the bins overlapping  $\alpha$ -cell specific ATAC peaks. (g) Define a small number of bins with  $\alpha$ -cell specific (red) and  $\beta$ -cell specific (blue) DI values. (h) Compare the ATAC peak strength and gene expression within the bins with  $\alpha$ -cell or  $\beta$ -cell specific DI values. (i) Scatterplot comparing the strength of loops between  $\alpha$ -cells and  $\beta$ -cells. Heat colored dots are loops overlapping 5,000  $\beta$ -cell specific ATAC peaks (left panel) or 5,000  $\alpha$ -cell specific ATAC peaks (right panel). (j) Scatter plots highlighting the  $\alpha$ -cell or  $\beta$ -cell specific loops from **Fig. 3b** to examine their correlation with compartment switching events.

# Supplementary Fig 4

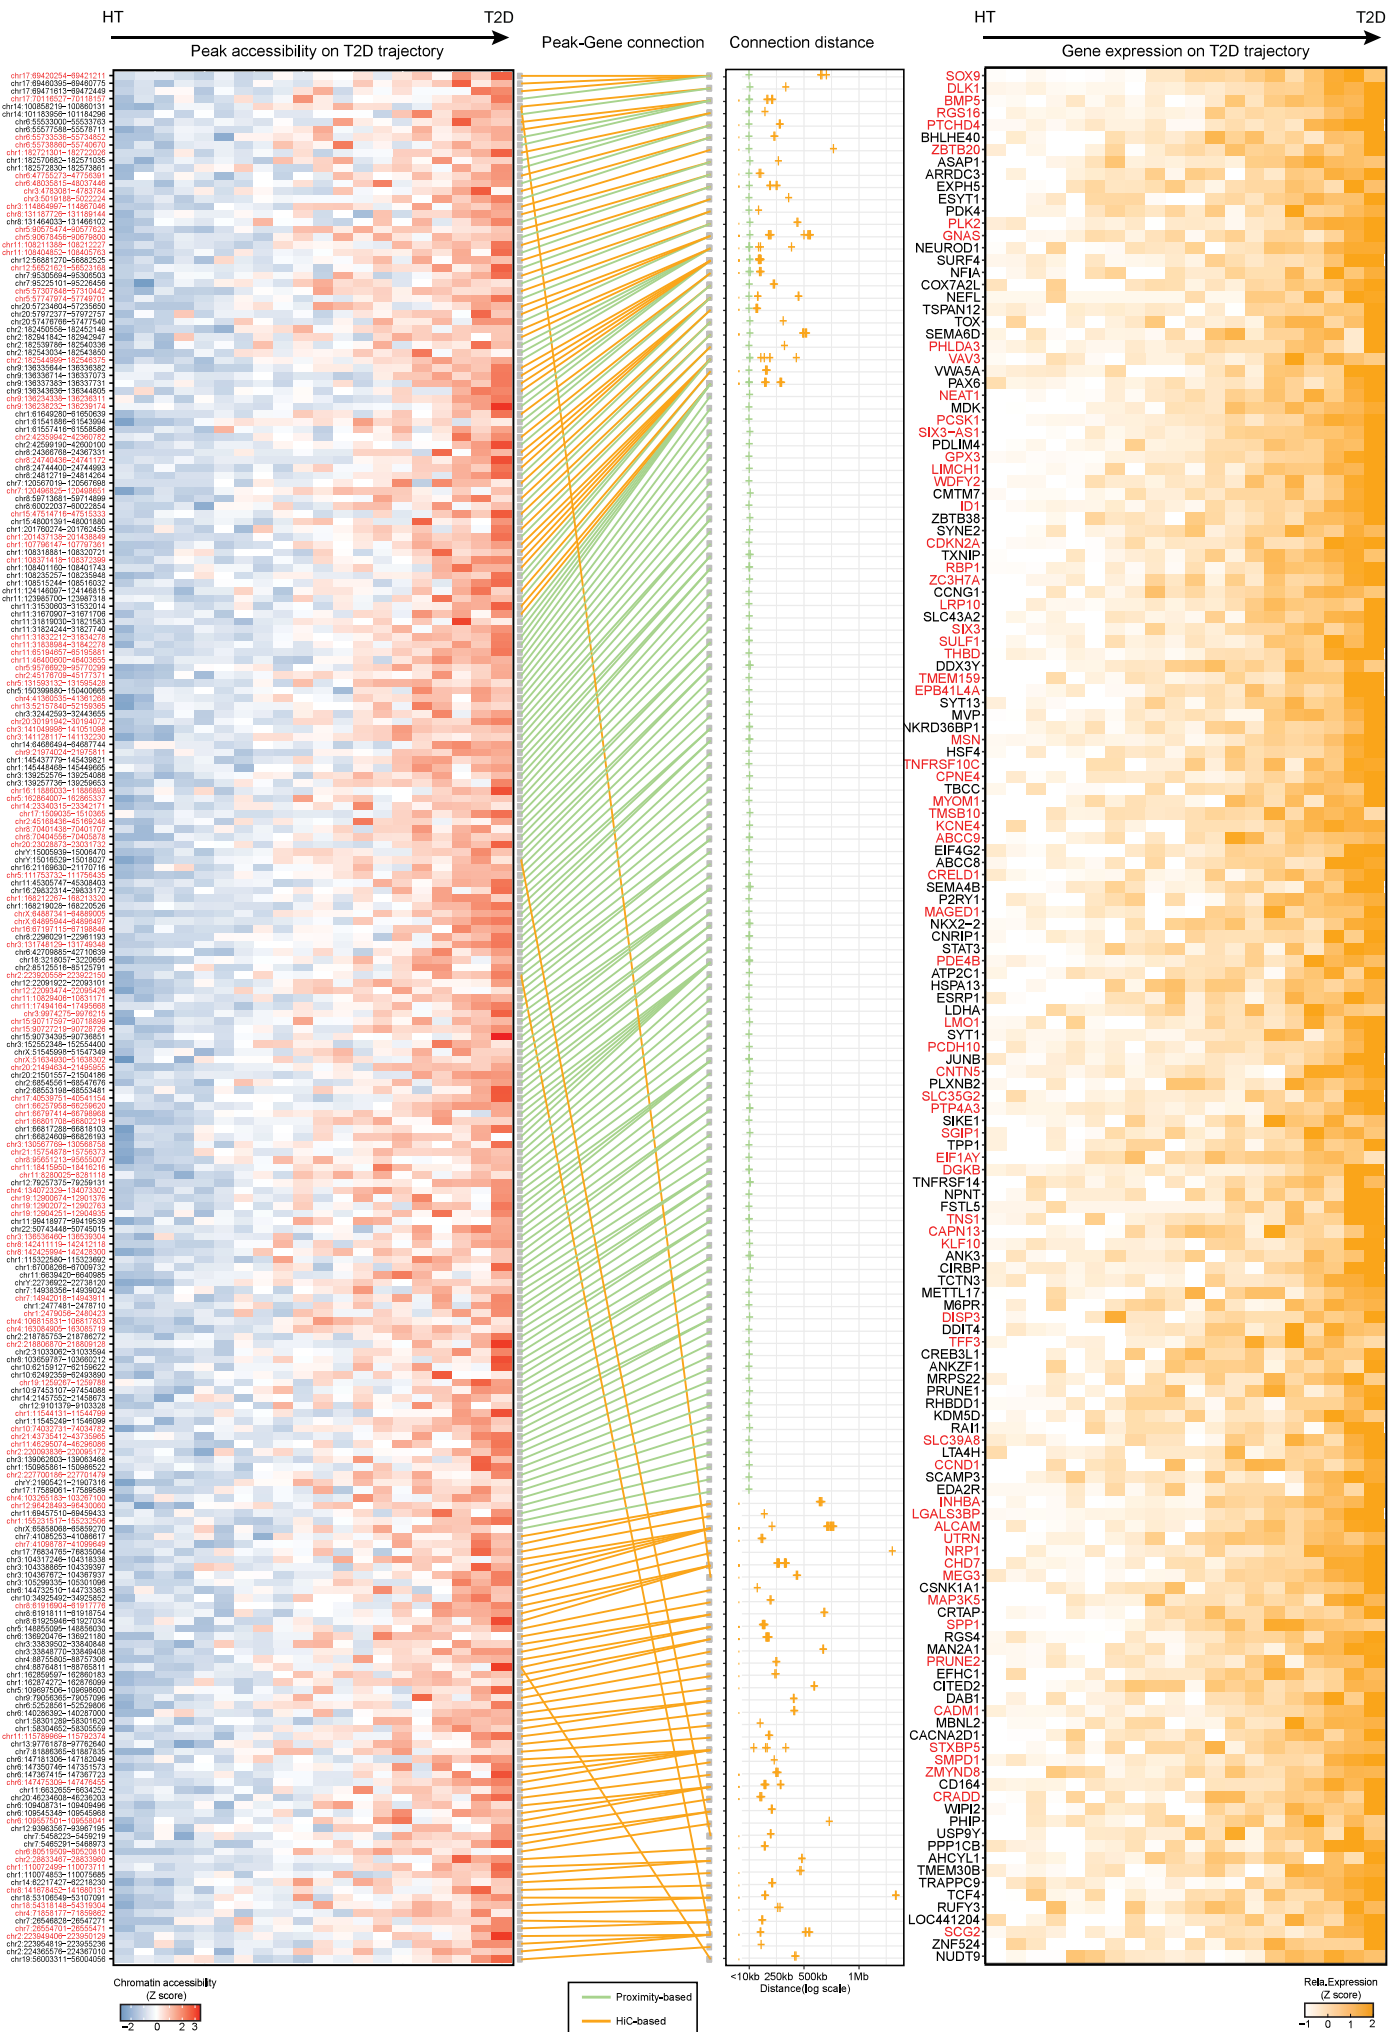



**Supplementary Fig. 4. A network of T2D upregulated peak-gene pairs.**

Connect T2D up-regulated ATAC peaks to up-regulated genes from RePACT analyses through multiomic integration (similar as **Fig. 6a**). Leftmost panel: heatmap of peaks gaining accessibility along T2D trajectory; peak locations (hg19) are on the left of each row. Peaks highlighted in red show intra-donor heterogeneity. Second panel shows the peak-gene connections. Green lines: peaks within 10kb of the TSS; orange lines: distal peak-gene pairs supported by Hi-C loops. Third panel: the distance of each peak-TSS connection. Rightmost panel: heatmap of T2D up-regulated genes. Red-highlighted gene names indicate intra-donor heterogeneous genes.

## Supplementary Fig 5

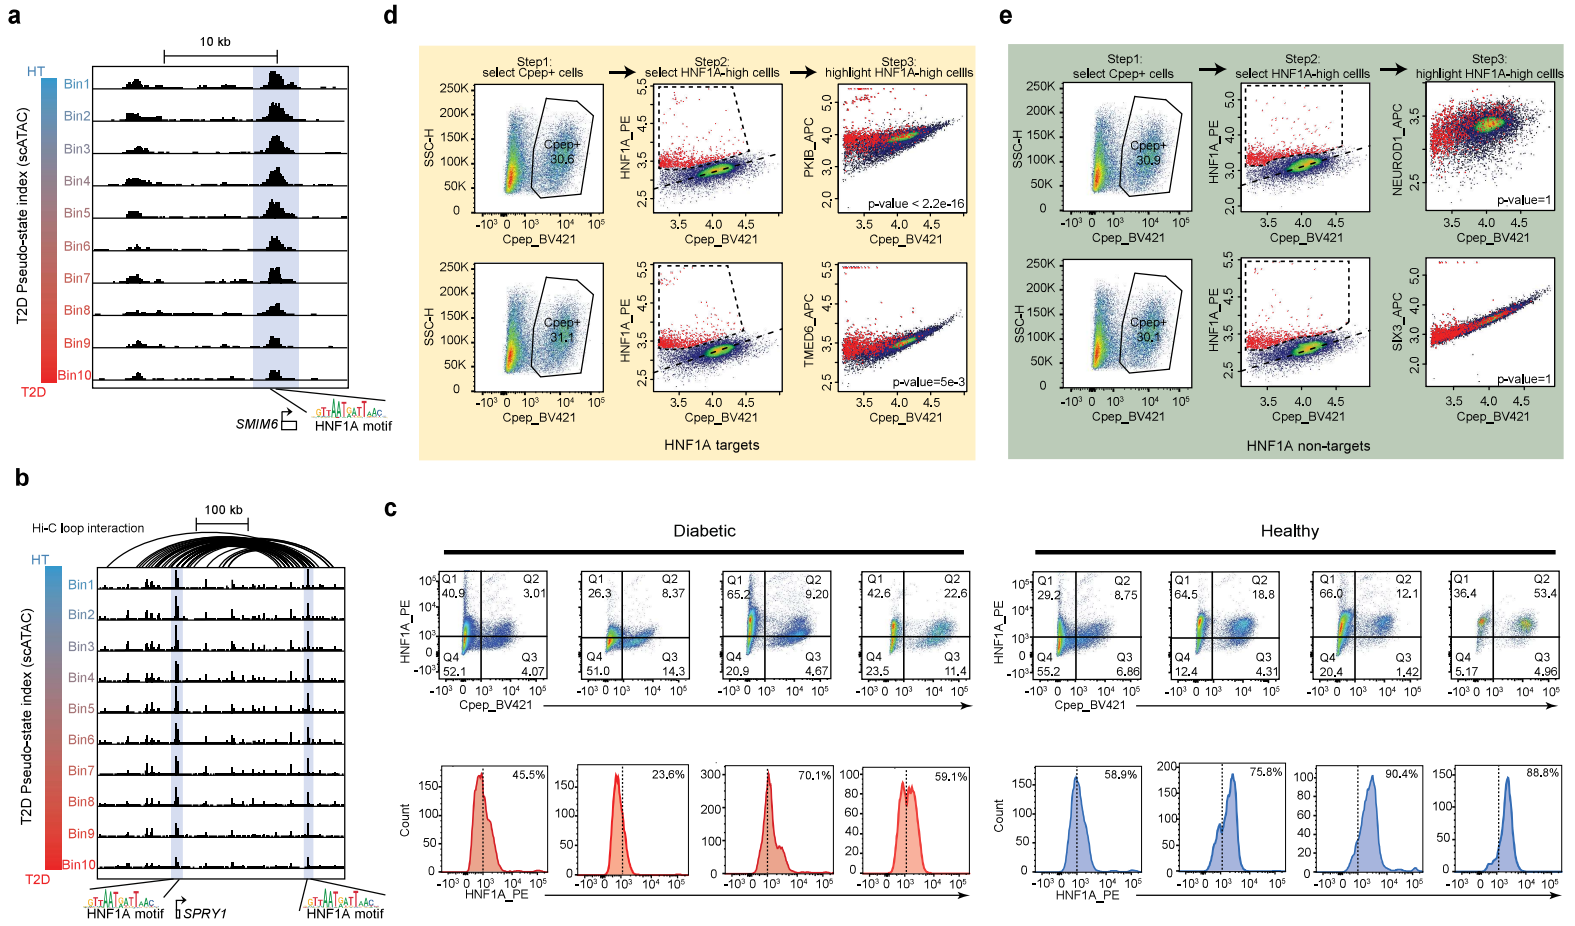

### **Supplementary Fig. 5. Role of HNF1A in Type II Diabetes**

Similar as **Fig. 6d**, genome browser snapshots of putative *HNF1A* target genes *SMIM6* (**a**) and *SPRY1* (**b**). (**c**) Flow cytometry scatterplot (top row) of HNF1A and C-pep islet cells from 4 healthy and 4 diabetic donors. The histogram (bottom row) shows the distribution of HNF1A signal in the  $\beta$ -cells (gated with C-peptide) from 4 healthy (blue) and 4 diabetic (red) donors. (**d-e**) Similar as **Fig. 7c-d**, additional  $\beta$ -cell three-way flow cytometry results for (**d**) *HNF1A* target genes PKIB and TMED6 in non-diabetic islets, and (**e**) control genes NEUROD1 and SIX3 in non-diabetic islets. P values from one sided *t.test*.

## Supplementary Figure 6

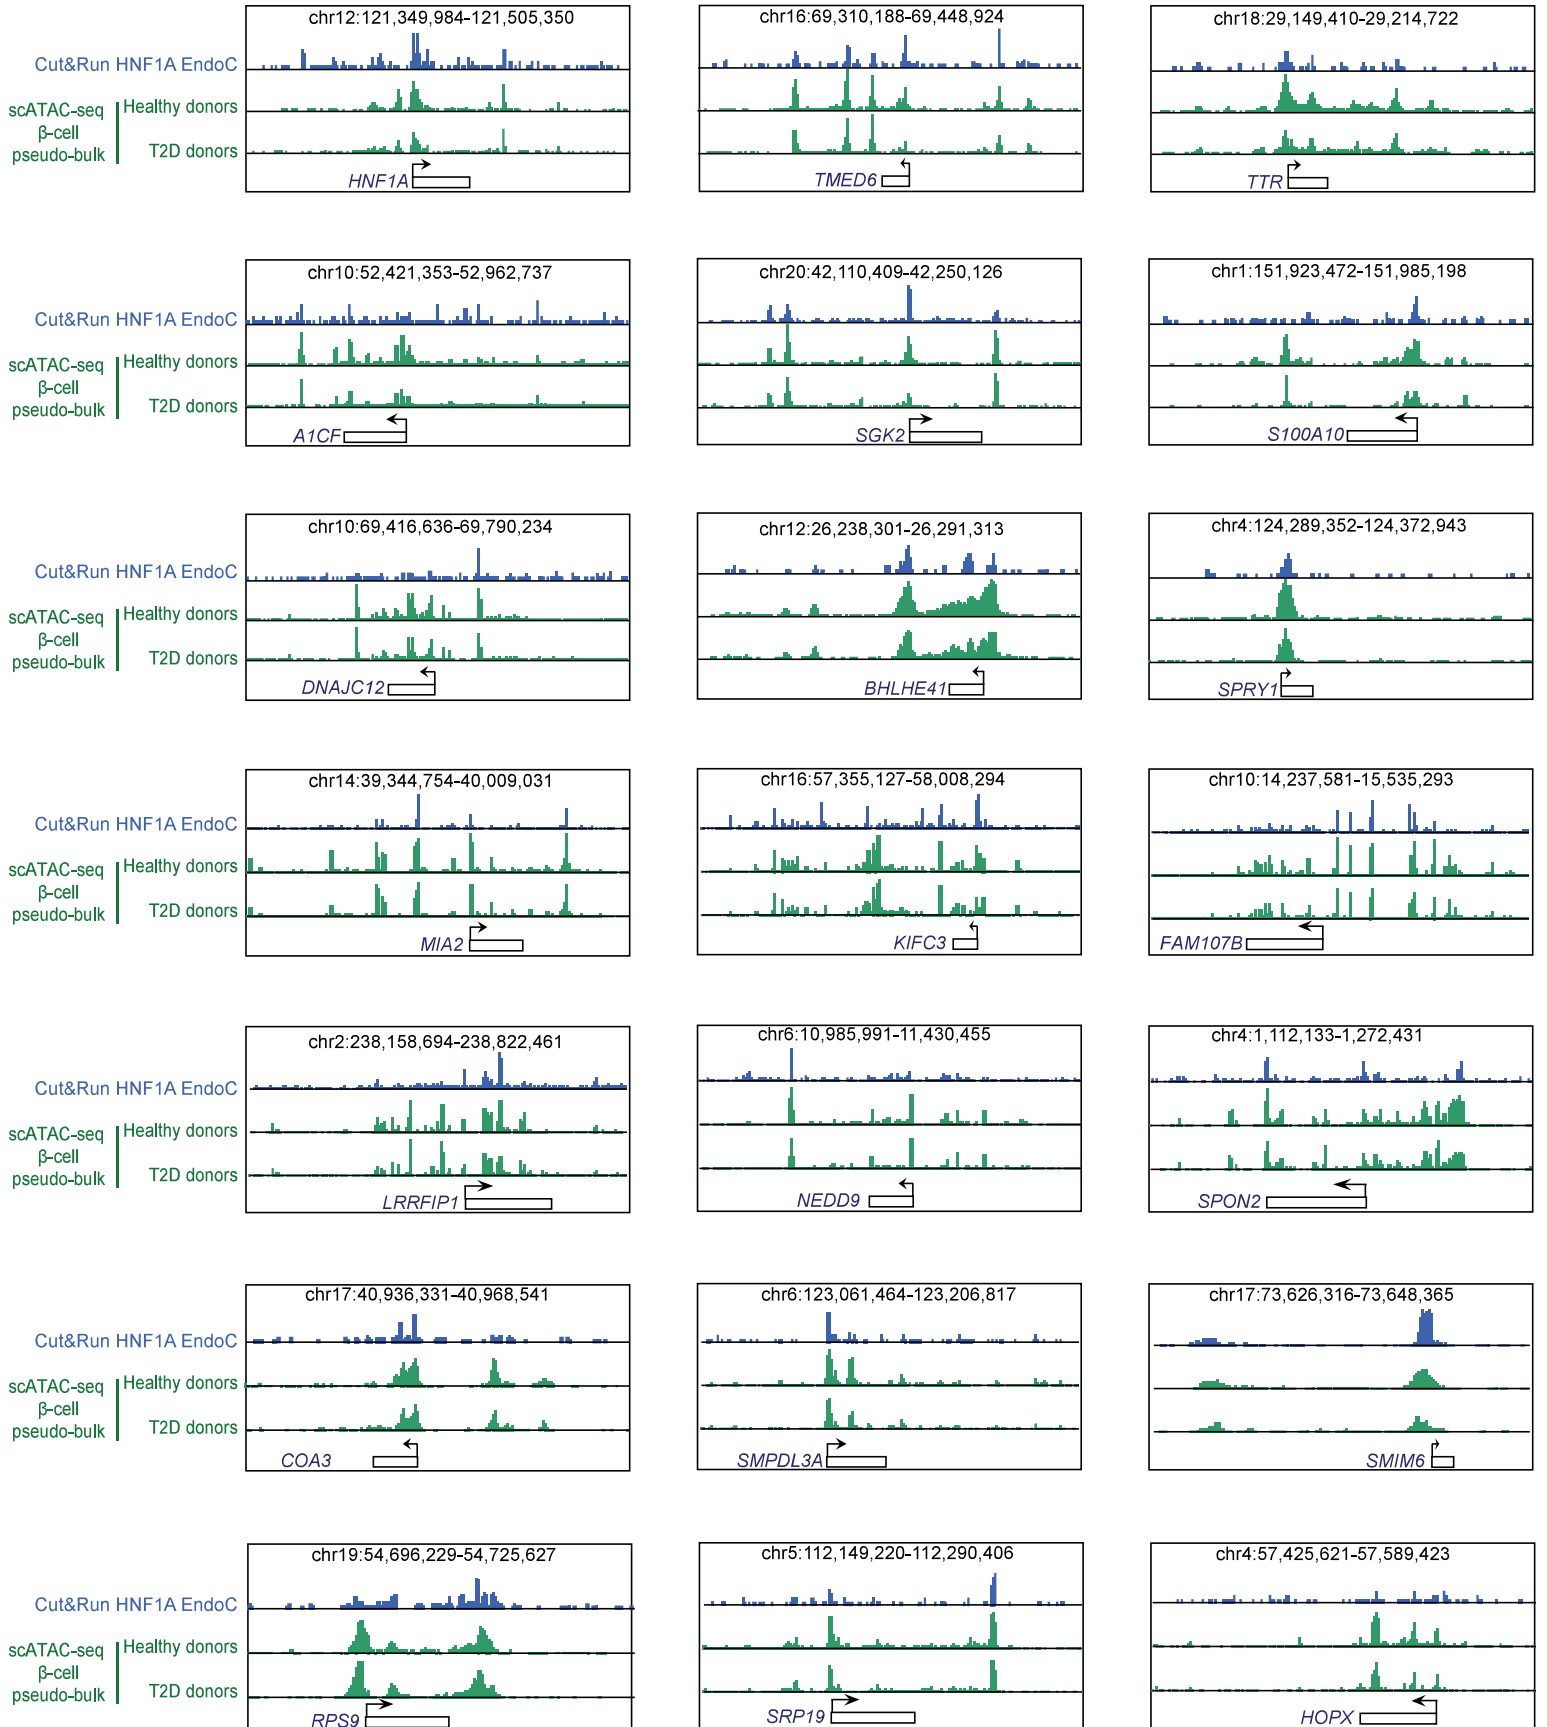

**Supplementary Fig. 6. HNF1A Cut&Run in EndoC-βH3**

Genome browser snapshots of select *HNF1A* target gene loci. Each track has HNF1A Cut&Run (blue) and pseudo-bulk ATAC tracks from T2D and healthy β cells (green).

# Supplementary Fig 7

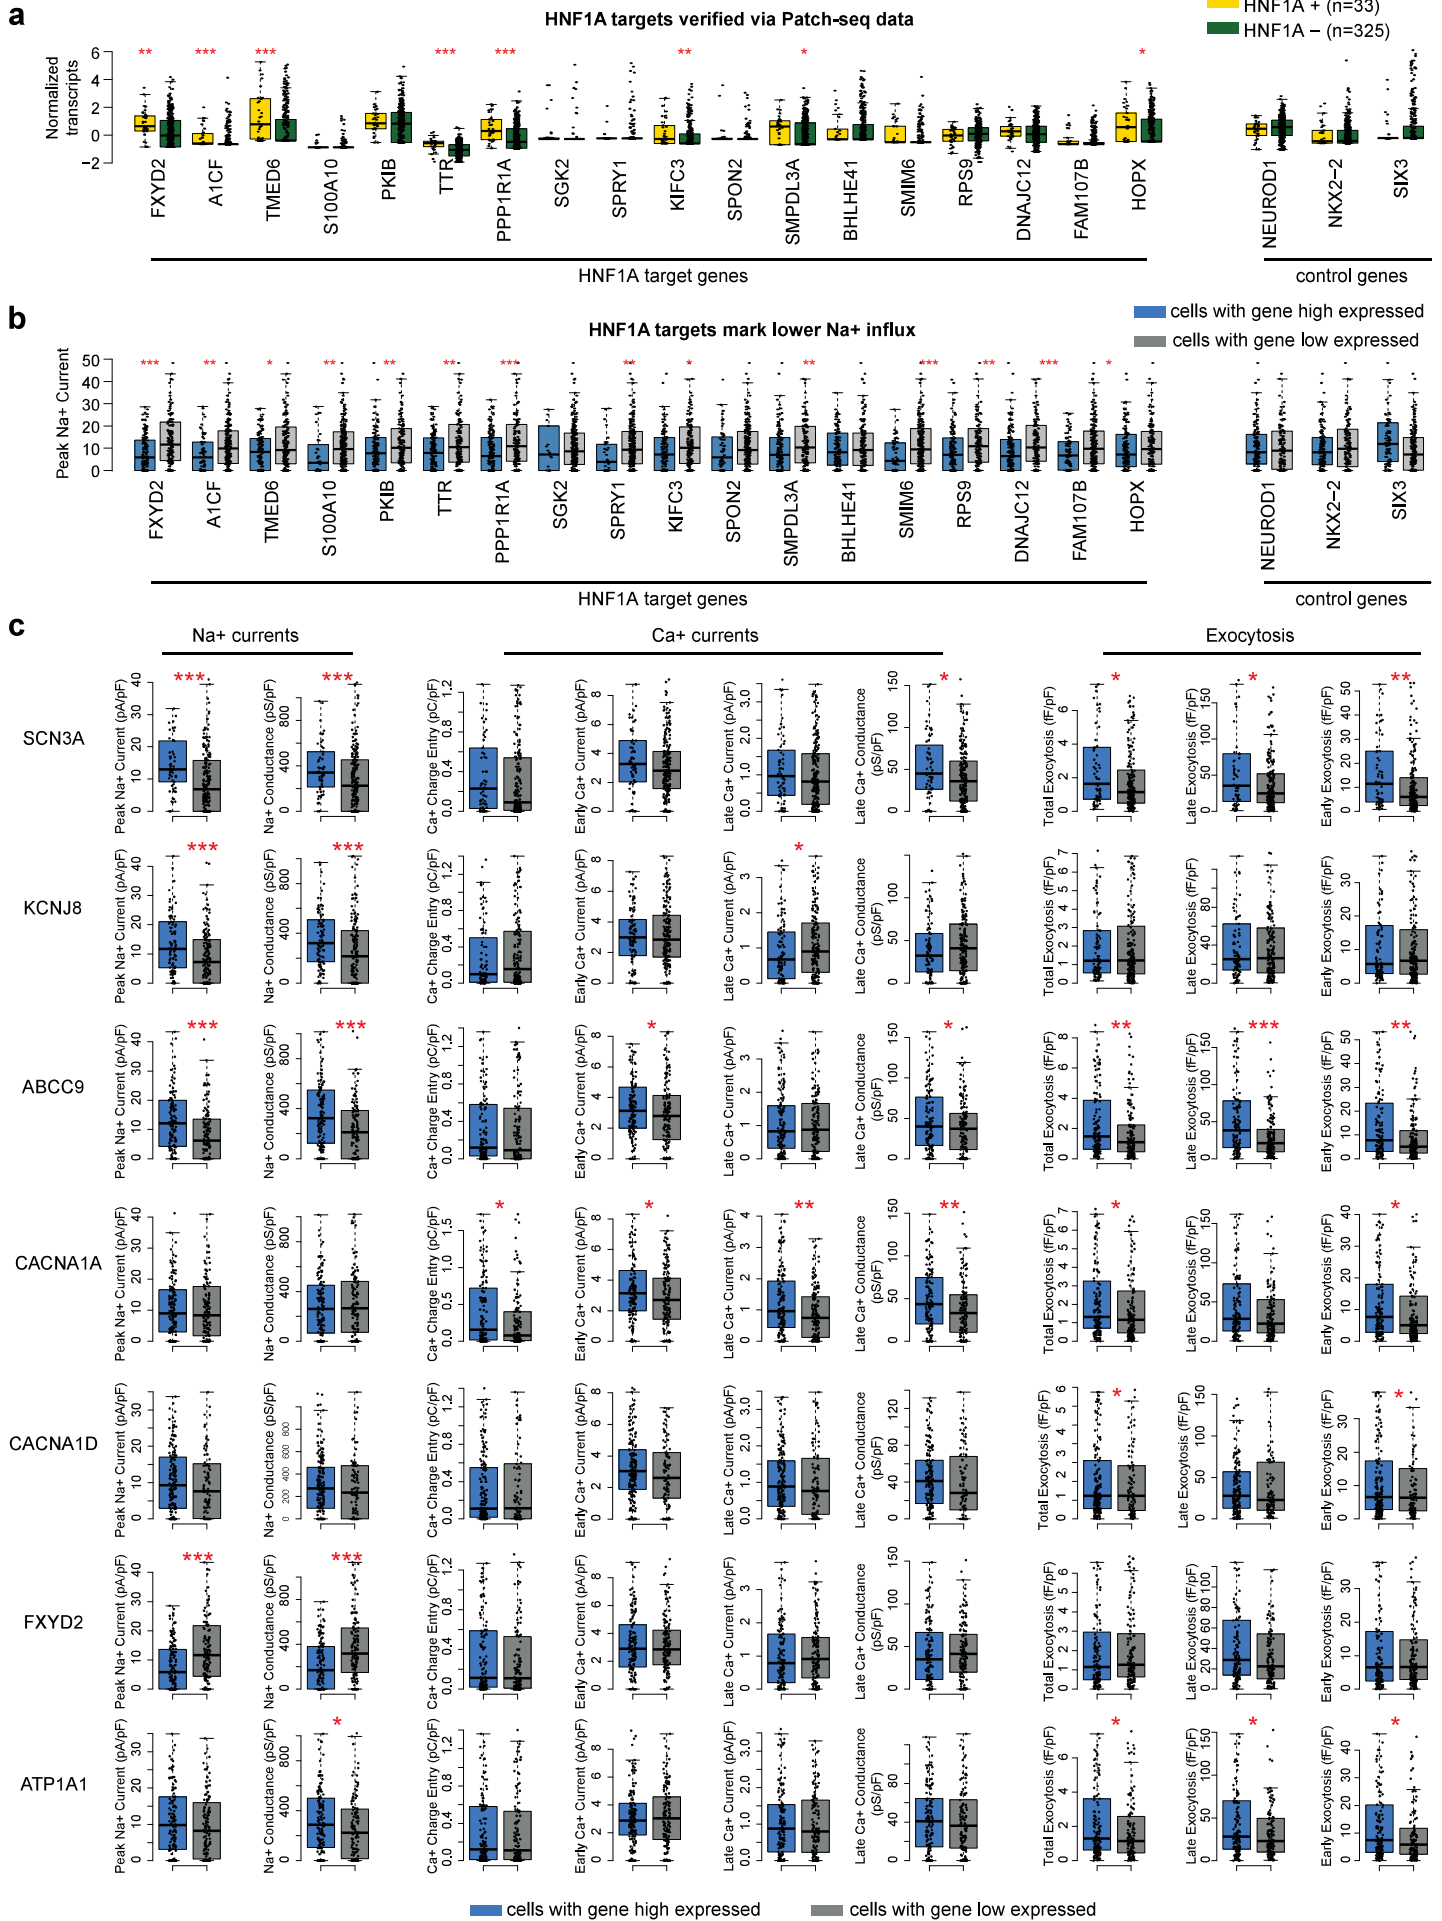

**Supplementary Fig. 7. Additional Patch-seq data analysis related to *HNF1A* functions.**

(a) Expression of *HNF1A* target genes and three non-target control genes in *HNF1A*+  $\beta$  cells (yellow, n=33) and *HNF1A*-  $\beta$  cells (green, n=325) from Patch-seq data (**Methods**). \*\*\*p < 0.001, \*\*p < 0.01, \*p < 0.05 (Mann-Whitney U test). (b) Boxplots showing the association between *HNF1A* target genes and Na<sup>+</sup> current measurement from Patch-seq data. For each gene of interest,  $\beta$ -cells are divided into high expression group (blue) and low expression group (grey) (**Methods**). \*\*\*p < 0.001, \*\*p < 0.01, \*p < 0.05 (Mann-Whitney U test). (c) For every denoted channel gene, cells are divided into high- and low-expression groups (**Methods**). The boxplots show if the gene expression is associated with a variety of electrophysiological measurements from Patch-seq data. \*\*\*p < 0.001, \*\*p < 0.01, \*p < 0.05 (Mann-Whitney U test).

**Supplementary Table 1. eHi-C reads summary**

| Cell type | Sample      | Total reads | Uniquely mapped | Non-redundant | Cis         | Trans       | Cis-2Mb     |
|-----------|-------------|-------------|-----------------|---------------|-------------|-------------|-------------|
| Alpha     | Hi-C.alpha1 | 405,505,134 | 211,513,369     | 165,434,689   | 265,909,112 | 129,064,344 | 153,872,881 |
|           | Hi-C.alpha2 | 350,990,532 | 170,669,624     | 148,809,750   |             |             |             |
|           | Hi-C.alpha3 | 398,703,410 | 72,194,498      | 60,303,123    |             |             |             |
|           | Hi-C.alpha4 | 368,176,579 | 219,650,622     | 187,385,773   |             |             |             |
|           | Hi-C.alpha5 | 417,280,536 | 272,466,837     | 231,279,903   |             |             |             |
|           | Hi-C.alpha6 | 437,437,508 | 229,231,601     | 192,318,080   |             |             |             |
|           | Hi-C.alpha7 | 430,008,729 | 194,518,534     | 172,247,820   |             |             |             |
| Beta      | Hi-C.beta1  | 397,634,633 | 184,709,869     | 147,274,958   | 195,737,809 | 87,367,515  | 120,099,961 |
|           | Hi-C.beta2  | 385,862,924 | 57,501,715      | 50,498,651    |             |             |             |
|           | Hi-C.beta3  | 387,875,392 | 131,038,273     | 105,789,167   |             |             |             |
|           | Hi-C.beta4  | 404,610,467 | 254,126,546     | 210,718,872   |             |             |             |
|           | Hi-C.beta5  | 461,766,459 | 253,441,320     | 215,582,251   |             |             |             |
|           | Hi-C.beta6  | 476,561,356 | 219,768,827     | 173,865,774   |             |             |             |



**Supplementary Table 2. Tn5 oligos**

| Oligo name | Sequence                                                     |
|------------|--------------------------------------------------------------|
| pMENTS     | 5Phos/CTGTCTCTTATACACATCT                                    |
| Tn5_p7_1   | GTCTCGTGGGCTCGG <b>AAACAC</b> GTCTCCGCCTCAGATGTGTATAAGAGACAG |
| Tn5_p7_2   | GTCTCGTGGGCTCGG <b>AAAGGG</b> GTCTCCGCCTCAGATGTGTATAAGAGACAG |
| Tn5_p7_3   | GTCTCGTGGGCTCGG <b>AACCGAG</b> TCTCCGCCTCAGATGTGTATAAGAGACAG |
| Tn5_p7_4   | GTCTCGTGGGCTCGG <b>CCAATAG</b> TCTCCGCCTCAGATGTGTATAAGAGACAG |
| Tn5_p7_5   | GTCTCGTGGGCTCGG <b>CCTCTT</b> GTCTCCGCCTCAGATGTGTATAAGAGACAG |
| Tn5_p7_6   | GTCTCGTGGGCTCGG <b>CGTGAT</b> GTCTCCGCCTCAGATGTGTATAAGAGACAG |
| Tn5_p7_7   | GTCTCGTGGGCTCGG <b>GCTGAAG</b> TCTCCGCCTCAGATGTGTATAAGAGACAG |
| Tn5_p7_8   | GTCTCGTGGGCTCGG <b>GGACAAG</b> TCTCCGCCTCAGATGTGTATAAGAGACAG |
| Tn5_p7_9   | GTCTCGTGGGCTCGG <b>GGCATT</b> GTCTCCGCCTCAGATGTGTATAAGAGACAG |
| Tn5_p7_10  | GTCTCGTGGGCTCGG <b>TGTCTAG</b> TCTCCGCCTCAGATGTGTATAAGAGACAG |
| Tn5_p7_11  | GTCTCGTGGGCTCGG <b>TTACCCG</b> TCTCCGCCTCAGATGTGTATAAGAGACAG |
| Tn5_p7_12  | GTCTCGTGGGCTCGG <b>TTTCAGG</b> TCTCCGCCTCAGATGTGTATAAGAGACAG |
| Tn5_p5_a   | TCGTCCGCAGCGTC <b>AAGATC</b> TCGAGGACGGCAGATGTGTATAAGAGACAG  |
| Tn5_p5_b   | TCGTCCGCAGCGTC <b>AATTC</b> TTCGAGGACGGCAGATGTGTATAAGAGACAG  |
| Tn5_p5_c   | TCGTCCGCAGCGTC <b>CCTAAG</b> CTCGAGGACGGCAGATGTGTATAAGAGACAG |
| Tn5_p5_d   | TCGTCCGCAGCGTC <b>CTTG</b> TGTCGAGGACGGCAGATGTGTATAAGAGACAG  |
| Tn5_p5_e   | TCGTCCGCAGCGTC <b>GAATAG</b> TCGAGGACGGCAGATGTGTATAAGAGACAG  |
| Tn5_p5_f   | TCGTCCGCAGCGTC <b>GATGCT</b> TTCGAGGACGGCAGATGTGTATAAGAGACAG |
| Tn5_p5_g   | TCGTCCGCAGCGTC <b>TCCAAG</b> TCGAGGACGGCAGATGTGTATAAGAGACAG  |
| Tn5_p5_h   | TCGTCCGCAGCGTC <b>TGGGTT</b> TTCGAGGACGGCAGATGTGTATAAGAGACAG |

**Supplementary Table 3. PCR oligos**

| Name          | Sequence                                              |
|---------------|-------------------------------------------------------|
| Nextera_N701  | CAAGCAGAAGACGGCATAACGAGATTCGCCTTAGTCTCGTGGGCTCGG      |
| Nextera_N702  | CAAGCAGAAGACGGCATAACGAGATCTAGTACGGTCTCGTGGGCTCGG      |
| Nextera_N703  | CAAGCAGAAGACGGCATAACGAGATTTCTGCCTGTCTCGTGGGCTCGG      |
| Nextera_N704  | CAAGCAGAAGACGGCATAACGAGATGCTCAGGAGTCTCGTGGGCTCGG      |
| Nextera_N705  | CAAGCAGAAGACGGCATAACGAGATAGGAGTCCGTCTCGTGGGCTCGG      |
| Nextera_N706  | CAAGCAGAAGACGGCATAACGAGATCATGCCTAGTCTCGTGGGCTCGG      |
| Nextera_N707  | CAAGCAGAAGACGGCATAACGAGATGTAGAGAGGTCTCGTGGGCTCGG      |
| Nextera_N708  | CAAGCAGAAGACGGCATAACGAGATCCTCTCTGGTCTCGTGGGCTCGG      |
| Nextera_N709  | CAAGCAGAAGACGGCATAACGAGATAGCGTAGCGTCTCGTGGGCTCGG      |
| Nextera_N710  | CAAGCAGAAGACGGCATAACGAGATCAGCCTCGGTCTCGTGGGCTCGG      |
| Nextera_N711  | CAAGCAGAAGACGGCATAACGAGATTGCCTCTTGTCTCGTGGGCTCGG      |
| Nextera_N712  | CAAGCAGAAGACGGCATAACGAGATTCCTCTACGTCTCGTGGGCTCGG      |
| Nextera_N713  | CAAGCAGAAGACGGCATAACGAGATTCATGAGCGTCTCGTGGGCTCGG      |
| Nextera_N714  | CAAGCAGAAGACGGCATAACGAGATCCTGAGATGTCTCGTGGGCTCGG      |
| Nextera_N715  | CAAGCAGAAGACGGCATAACGAGATTAGCGAGTGTCTCGTGGGCTCGG      |
| Nextera_N716  | CAAGCAGAAGACGGCATAACGAGATGTAGCTCCGTCTCGTGGGCTCGG      |
| Nextera_N717  | CAAGCAGAAGACGGCATAACGAGATTACTIONCGGTCTCGTGGGCTCGG     |
| Nextera_N718  | CAAGCAGAAGACGGCATAACGAGATAGGCTCCGGTCTCGTGGGCTCGG      |
| Nextera_N719  | CAAGCAGAAGACGGCATAACGAGATGCAGCGTAGTCTCGTGGGCTCGG      |
| Nextera_N720  | CAAGCAGAAGACGGCATAACGAGATCTGCCATGTCTCGTGGGCTCGG       |
| Nextera_N721  | CAAGCAGAAGACGGCATAACGAGATGAGCGCTAGTCTCGTGGGCTCGG      |
| Nextera_N722  | CAAGCAGAAGACGGCATAACGAGATCGCTCAGTGTCTCGTGGGCTCGG      |
| Nextera_N723  | CAAGCAGAAGACGGCATAACGAGATGTCTTAGGGTCTCGTGGGCTCGG      |
| Nextera_N724  | CAAGCAGAAGACGGCATAACGAGATACTGATCGGTCTCGTGGGCTCGG      |
| Nextera_N725  | CAAGCAGAAGACGGCATAACGAGATTAGCTGCAGTCTCGTGGGCTCGG      |
| Extended_N726 | CAAGCAGAAGACGGCATAACGAGATCTCATTGTGTCTCGTGGGCTCGG      |
| Extended_N727 | CAAGCAGAAGACGGCATAACGAGATGAGTGTAGGTCTCGTGGGCTCGG      |
| Extended_N728 | CAAGCAGAAGACGGCATAACGAGATGCTAGGTTGTCTCGTGGGCTCGG      |
| Extended_N729 | CAAGCAGAAGACGGCATAACGAGATGGAAGGATGTCTCGTGGGCTCGG      |
| Extended_N730 | CAAGCAGAAGACGGCATAACGAGATGGTCACTCGTCTCGTGGGCTCGG      |
| Extended_N731 | CAAGCAGAAGACGGCATAACGAGATGTTTCGTTGTCTCGTGGGCTCGG      |
| Extended_N732 | CAAGCAGAAGACGGCATAACGAGATTCAAACATGTCTCGTGGGCTCGG      |
| Extended_N733 | CAAGCAGAAGACGGCATAACGAGATTCACATGTGTCTCGTGGGCTCGG      |
| Extended_N734 | CAAGCAGAAGACGGCATAACGAGATGTTTCCGTCTCGTGGGCTCGG        |
| Extended_N735 | CAAGCAGAAGACGGCATAACGAGATAAACAAACGTCTCGTGGGCTCGG      |
| Extended_N736 | CAAGCAGAAGACGGCATAACGAGATTTACATCGTCTCGTGGGCTCGG       |
| Nextera_N501  | AATGATACGGCGACCACCGAGATCTACACTAGATCGCTCGTCGGCAGCGTC   |
| Nextera_N502  | AATGATACGGCGACCACCGAGATCTACACCTCTCTATTCGTCGGCAGCGTC   |
| Nextera_N503  | AATGATACGGCGACCACCGAGATCTACACTATCCTCTTCGTCGGCAGCGTC   |
| Nextera_N504  | AATGATACGGCGACCACCGAGATCTACACAGAGTAGATCGTCGGCAGCGTC   |
| Nextera_N505  | AATGATACGGCGACCACCGAGATCTACACGTAAGGAGTCGTCGGCAGCGTC   |
| Nextera_N506  | AATGATACGGCGACCACCGAGATCTACACACTGCATATCGTCGGCAGCGTC   |
| Nextera_N507  | AATGATACGGCGACCACCGAGATCTACACAAGGAGTATCGTCGGCAGCGTC   |
| Nextera_N508  | AATGATACGGCGACCACCGAGATCTACACCTAAGCCTTCGTCGGCAGCGTC   |
| Nextera_N509  | AATGATACGGCGACCACCGAGATCTACACCGTCTAATTCGTCGGCAGCGTC   |
| Nextera_N510  | AATGATACGGCGACCACCGAGATCTACACTCTCTCCGTCTCGTCGGCAGCGTC |
| Nextera_N511  | AATGATACGGCGACCACCGAGATCTACACTCGACTAGTCGTCGGCAGCGTC   |
| Nextera_N512  | AATGATACGGCGACCACCGAGATCTACACTTCTAGCTTCGTCGGCAGCGTC   |
| Nextera_N513  | AATGATACGGCGACCACCGAGATCTACACCCTAGAGTTCGTCGGCAGCGTC   |
| Nextera_N514  | AATGATACGGCGACCACCGAGATCTACACGGTAAGATCGTCGGCAGCGTC    |
| Nextera_N515  | AATGATACGGCGACCACCGAGATCTACACCTATTAAGTCGTCGGCAGCGTC   |
| Nextera_N516  | AATGATACGGCGACCACCGAGATCTACACAAGGCTATTCGTCGGCAGCGTC   |

|               |                                                              |
|---------------|--------------------------------------------------------------|
| Nextera_N517  | AATGATACGGCGACCACCGAGATCTACAC <b>GAGCCTT</b> ATCGTCGGCAGCGTC |
| Nextera_N518  | AATGATACGGCGACCACCGAGATCTACACT <b>TATGCGAT</b> CGTCGGCAGCGTC |
| Extended_N519 | AATGATACGGCGACCACCGAGATCTACACT <b>TTACATC</b> TCGTCGGCAGCGTC |
| Extended_N520 | AATGATACGGCGACCACCGAGATCTACACA <b>AAACAACT</b> CGTCGGCAGCGTC |
| Extended_N521 | AATGATACGGCGACCACCGAGATCTACAC <b>AGCAAAT</b> TCGTCGGCAGCGTC  |
| Extended_N522 | AATGATACGGCGACCACCGAGATCTACAC <b>CGTTGGTG</b> TCGTCGGCAGCGTC |
| Extended_N523 | AATGATACGGCGACCACCGAGATCTACAC <b>GACTTCT</b> TCGTCGGCAGCGTC  |
| Extended_N524 | AATGATACGGCGACCACCGAGATCTACAC <b>GGTCACTC</b> TCGTCGGCAGCGTC |

**Supplementary Table 4. qPCR primers**

| Primer    | Sequence 5' to 3'       |
|-----------|-------------------------|
| HNF1A F1  | GGTCCTACGTTACCAACACA    |
| HNF1A R1  | CTCTGGGTCACATGGCTCT     |
| S100A10 F | GGCTACTTAACAAAGGAGGACC  |
| S100A10 R | GAGGCCCGCAATTAGGGAAA    |
| A1CF F    | TGTGGACAACCTGCCGATTATTT |
| A1CF R    | TGACATCGACAACACCTTCAGTA |
| TTR F     | TGGGAGCCATTTGCCTCTG     |
| TTR R     | AGCCGTGGTGGGAATAGGAGTA  |
| DNAJC12 F | AGCATCCTGAAAACCCCAAAG   |
| DNAJC12 R | GCGAGAAACCCACCGTCTT     |
| BHLHE41 F | AAGGAGCATGAAACGAGACGA   |
| BHLHE41 R | CTCGGTAAAGGCGGTTAAAGC   |
| KIF3 F    | GTGGAGCTGCGACTCAAGG     |
| KIF3 R    | CTGCTTGGTCTTGGACGACT    |
| PPP1R1A F | CCACGGCAACGGAAGAAGAT    |
| PPP1R1A R | CCCCAGGTGATGTTCAACCA    |
| SGK2 F    | ACTCCACCCTTCAACCCAAAT   |
| SGK2 R    | GCGCATAAGAAAATCCCAGGAA  |
| TMED6 F   | GGGCTGGTCGTTCTGAATCTA   |
| TMED6 R   | CGCTGAACCTCGTAACTGAAAT  |
| PKIB F    | GAGTCTGGGGTCGCCAATTTT   |
| PKIB R    | TGAACTCTGGATGTCTGGTAAGG |
| GAPDH F   | GGAGCGAGATCCCTCCAAAAT   |
| GAPDH R   | GGCTGTTGTCATACTTCTCATGG |
| ACTIN F   | CATGTACGTTGCTATCCAGGC   |
| ACTIN R   | CTCCTTAATGTCACGCACGAT   |
| FXVD2 F   | ATCCTCCTCAGTAAGTGGGGT   |
| FXVD2 R   | CTTGGCAACTCCCGAAAGC     |

**Supplementary Table 5. Antibodies used in this study**

| <b>Flow Cytometry Antibodies</b> |                             |                             |
|----------------------------------|-----------------------------|-----------------------------|
| Target                           | Primary Ab                  | Secondary Ab                |
| HNF1A                            | Cat# 89670S, CST            | Cat# 406421, Biolegend      |
| CPEP                             | Cat# GN-ID4-s, DSHB         | Cat# 565013, BD Biosciences |
| TTR                              | Cat# sc-377517, Santa Cruz  | Cat# A865, Invitrogen       |
| SIX3                             | Cat# sc-398797, Santa Cruz  | Cat# A865, Invitrogen       |
| TMED6                            | Cat# SAB1408365, Sigma      | Cat# A865, Invitrogen       |
| PKIB                             | Cat# SAB1412738, Sigma      | Cat# A865, Invitrogen       |
| A1CF                             | Cat# SAB1400523, Sigma      | Cat# A865, Invitrogen       |
| NEUROD1                          | Cat# 563566, BD Biosciences | --                          |
| NKX2.2                           | Cat# 564729, BD Biosciences | --                          |

**Primary Ab**

| Name    | Catalog #       | Lot #      | Clone # | Dilution | Manufacturer   |
|---------|-----------------|------------|---------|----------|----------------|
| HNF1A   | Cat# 89670S     | #1         | NA      | 1:50     | CST            |
| CPEP    | Cat# GN-ID4-s   | NA         | NA      | 1:50     | DSHB           |
| TTR     | Cat# sc-377517  | #J0316     | NA      | 1:50     | Santa Cruz     |
| SIX3    | Cat# sc-398797  | #B0922     | NA      | 1:50     | Santa Cruz     |
| TMED6   | Cat# SAB1408365 | #10027     | NA      | 1:50     | Sigma          |
| PKIB    | Cat# SAB1412738 | #12139-7F8 | NA      | 1:50     | Sigma          |
| A1CF    | Cat# SAB1400523 | #HC271     | NA      | 1:50     | Sigma          |
| NEUROD1 | Cat# 563566     | #8352861   | R8-294  | 1:50     | BD Biosciences |
| NKX2.2  | Cat# 564729     | #9031625   | 74.5A5  | 1:50     | BD Biosciences |

**Secondary Ab**

|                       |             |          |          |       |                |
|-----------------------|-------------|----------|----------|-------|----------------|
| PE Donkey anti-rabbit | Cat# 406421 | #B233152 | poly4064 | 1:125 | Biolegend      |
| BV421 Goat anti-rat   | Cat# 565013 | #1085807 | NA       | 1:125 | BD Biosciences |
| APC Goat anti-mouse   | Cat# A865   | #2384050 | NA       | 1:125 | Invitrogen     |

**Cut and Run Ab**

|       |               |            |    |     |       |
|-------|---------------|------------|----|-----|-------|
| HNF1A | Cat# ab204306 | #1003158-2 | NA | 1ug | abcam |
|-------|---------------|------------|----|-----|-------|

**Supplementary Table 6. Patient Donor Information used in this study**

| Islets used in scRNA-seq/scATAC-seq |       |      |           |     |
|-------------------------------------|-------|------|-----------|-----|
| Donor                               | HbA1C | BMI  | Age (yrs) | Sex |
| H1                                  | 5.8   | 31.9 | 45        | M   |
| H2                                  | 5.6   | 24.2 | 24        | M   |
| H3                                  | 5.4   | 30.7 | 62        | F   |
| H4                                  | 5.8   | 35.1 | 41        | M   |
| H5                                  | 5.6   | 28.5 | 55        | M   |
| H6                                  | 5.2   | 23.5 | 41        | M   |
| H7                                  | 5.4   | 23.2 | 43        | F   |
| T2D1                                | 6.7   | 32.5 | 58        | M   |
| T2D2                                | 5.9   | 31.7 | 63        | M   |
| T2D3                                | 7.6   | 24.8 | 52        | M   |
| T2D4                                | 6.7   | 25.8 | 53        | M   |

| Islets used in Flow Cytometry |       |      |           |     |                                  |
|-------------------------------|-------|------|-----------|-----|----------------------------------|
| Donor                         | HbA1C | BMI  | Age (yrs) | Sex | Fraction of HNF1A+ $\beta$ cells |
| H8                            | 5     | 31.4 | 43        | F   | 58.9                             |
| H9                            | 4.6   | 20.8 | 20        | M   | 75.8                             |
| H10                           | 5.4   | 30.7 | 62        | F   | 90.4                             |
| H7                            | 5.4   | 23.2 | 43        | F   | 88.8                             |
| T2D1                          | 6.7   | 32.5 | 58        | M   | 45.5                             |
| T2D5                          | 6.6   | 31.2 | 47        | M   | 23.6                             |
| T2D3                          | 7.6   | 24.8 | 52        | M   | 70.1                             |
| T2D4                          | 6.7   | 25.8 | 53        | M   | 59.1                             |
