# Supplementary material for: Single cell multiomic analysis reveals diabetes-associated β-cell heterogeneity driven by HNF1A
Source: PubMed Central journal article supplement (PMC10480445; doi:10.1038/s41467-023-41228-3), 2023-09-05
Supplement: 41467_2023_41228_MOESM3_ESM.pdf [file 41467_2023_41228_MOESM3_ESM.pdf]

## **Description of Additional Supplementary Files**

**Supplementary Data 1:** Islet cell-type specific gene expression

**Supplementary Data 2:** Islet cell-type specific peaks

**Supplementary Data 3:** Type II Diabetes trajectory genes and peaks identified by RePACT

**Supplementary Data 4:** Key Type II Diabetes transcription factors and their regulatory networks

**Supplementary Data 5:** QC for scRNA-seq and snATAC-seq

**Supplementary Data 6:** Chromatin loops in islet alpha and beta cells
